# Supplementary material for: Irisin recouples osteogenesis and osteoclastogenesis to protect wear-particle-induced osteolysis by suppressing oxidative stress and RANKL production
Source: Royal Society of Chemistry journal article supplement (doi:10.1039/d1bm00563d), 2021-01-01
Supplement: d1bm00563d1.pdf [file d1bm00563d1.pdf]

## **Irisin recouples osteogenesis and osteoclastogenesis to protect wear-particle-induced osteolysis by suppressing oxidative stress and RANKL production**

Sihan Hu,<sup>‡a,b</sup> Yuan Xue,<sup>‡a,b</sup> Jiachen He,<sup>a</sup> Chichi Chen,<sup>a</sup> Jie Sun,<sup>a</sup> Yesheng Jin,<sup>a,b</sup> Yuanshu Zhang,<sup>a,b</sup> Qin Shi,<sup>\*a</sup> and Yongjun Rui<sup>\*b</sup>

<sup>a</sup>Department of Orthopedics, the First Affiliated Hospital of Soochow University, Orthopedics Institute of Soochow University, Medical College of Soochow University, Suzhou, Jiangsu, 215006, P. R. China. E-mail: shiqin@suda.edu.cn for Dr. Qin Shi (Q. Shi)

Fax: +86-0512-67780999; Tel: +86-0512-67780999

<sup>b</sup>Department of Orthopedics, Wuxi Ninth People's Hospital affiliated to Soochow University, Wuxi, Jiangsu, 214026, P. R. China. E-mail: ruiyj@hotmail.com for Dr. Yongjun Rui (YJ. Rui)

Fax: +86-0510-85873955, Tel: +86-0510-85867999

<sup>‡</sup>These authors contributed equally to this work.

\*Corresponding author. E-mail: shiqin@suda.edu.cn for Dr. Qin Shi (Q. Shi), ruiyj@hotmail.com for Dr. Yongjun Rui (Y. Rui)

**FigureS1**

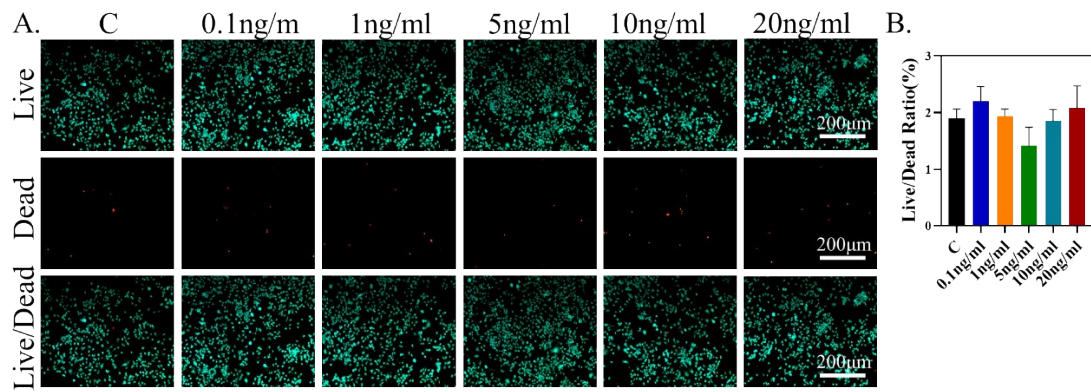

**FigS1:** RAW264.7 cells were cultured in the presence of indicated concentrations of Irisin for 3 days. (A) Live/Dead staining; (B) Live/Dead ratio. \* $P > 0.05$ .

**FigureS2**

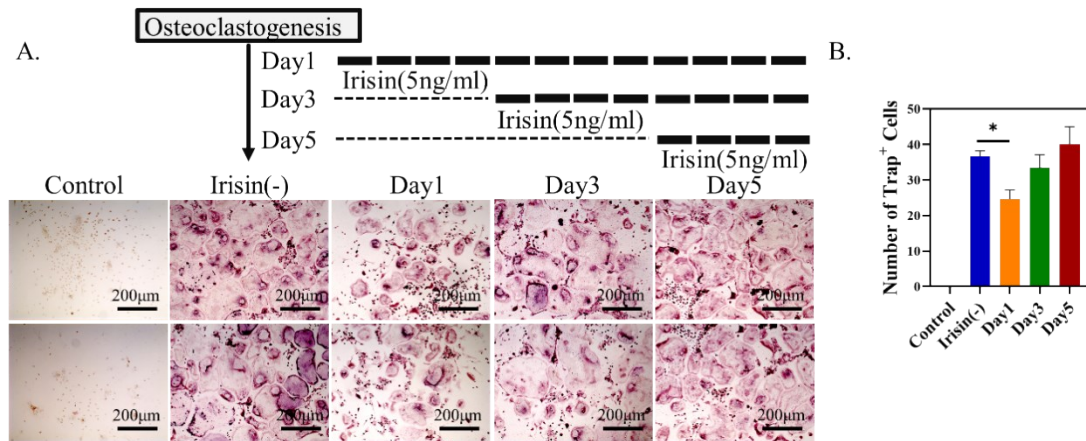

**FigS2:** BMMs were activated to osteoclasts and irisin was added at different stages (A) TRAP staining; (B) Number of TRAP-positive cells. \* $P < 0.05$ .

**FigureS3**

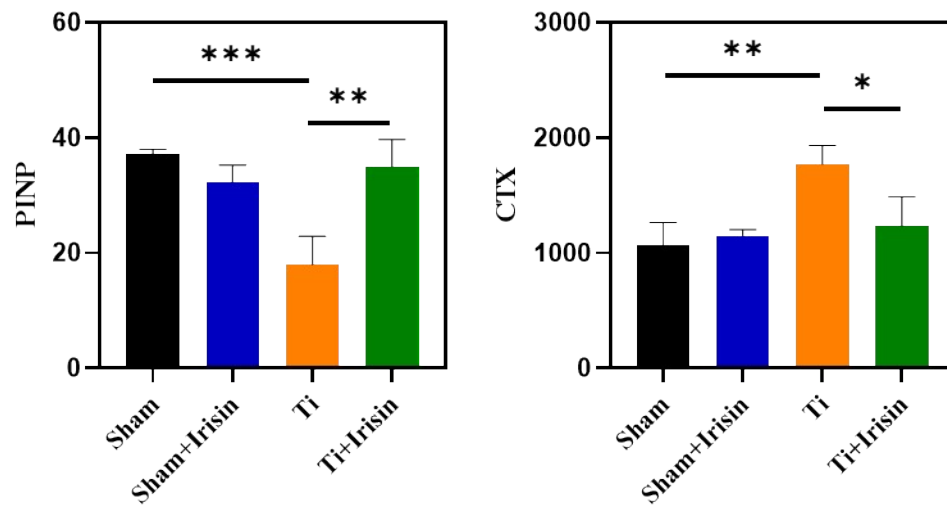

**FigS3:** PINP and CTX in the sera of mice with osteolysis induced by Ti Particles by

ELISA. \* $P < 0.05$ , \*\* $P < 0.01$ , \*\*\* $P < 0.001$ .
